# Supplementary material for: Stress response, behavior, and development are shaped by transposable element-induced mutations in Drosophila
Source: PLoS Genet. 2019 Feb 12;15(2):e1007900. doi: 10.1371/journal.pgen.1007900 (PMC6372155; doi:10.1371/journal.pgen.1007900)
Supplement: S5 Table — (XLSX) [file pgen.1007900.s017.xlsx]

## Sheet: Table S5
S5 Table. List of 36 TEs showing at least one significant (highlighted in red) selective sweep test (iHS, H12 or nSL).
TE	iHS		H12		nSL		Freq. Category	Significant tests
	NA	EU	NA	EU	NA	EU
FBti0019627	-0.10202	-1.86908	0.251636	0.229121	0.0776366	-0.557693	OOA	2
FBti0020057	-1.97093	0.955127	0.146127	0.0898631	2.61181	na	OOA	2
FBti0020096	-1.29128	-3.37543	0.0423795	0.0382861	2.1996	1.53041	OOA	2
FBti0020149	-1.49311	0.331403	0.274622	0.198572	2.59644	na	OOA	2
FBti0019453	-1.06321	na	0.164212	na	1.75061	na	OOA	2
FBti0019632	-1.12548	-0.295118	0.145794	1	1.50721	na	OOA	2
FBti0020393	-2.61215	-1.54961	0.0572278	0.0212259	1.48402	na	OOA	2
FBti0019457	-1.47034	na	0.096633	0.0247967	1.91166	na	OOA	1
FBti0019065	-1.6572	-0.158052	0.0344319	0.0486015	2.47025	-0.796102	OOA	1
FBti0018916	-2.25179	na	0.0463772	na	1.32658	na	OOA	1
FBti0019354	-1.84561	na	0.0745509	0.0335251	1.23889	na	OOA	1
FBti0019601	0.0151892	0.517248	0.0698394	1	0.272675	na	OOA	1
FBti0020091	-1.13355	-4.68759	0.051041	0.0612974	1.36288	na	OOA	1
FBti0018937	na	-3.75822	0.0716002	0.0224162	na	na	OOA	1
FBti0019079	-0.176387	na	0.136895	0.286253	0.385482	na	OOA	1
FBti0019081	-1.73705	0.903973	0.0314337	0.0200357	2.34323	0.269201	OOA	1
FBti0019279	-1.94879	na	0.209375	na	1.53412	na	OOA	1
FBti0019604	-1.53542	-1.26687	0.123379	0.0601071	1.60864	1.49259	OOA	1
FBti0019657	0.038369	-2.15241	0.0243427	0.0279706	-0.0747956	0.236402	OOA	1
FBti0020036	-2.57537	-0.026111	0.120809	0.0422535	0.679829	0.961479	OOA	1
FBti0020116	na	na	0.123189	na	na	na	OOA	1
FBti0019112	-0.689776	-4.67307	0.124997	0.124777	na	2.53674	AF-OOA	3
FBti0018880	-0.916765	na	0.179298	0.04146	1.98136	na	AF-OOA	2
FBti0019975	-2.78747	-4.88933	0.059417	0.0232097	0.60278	na	AF-OOA	2
FBti0020114	-1.80666	-0.057074	0.0575134	0.0668518	1.97655	0.52425	AF-OOA	2
FBti0020086	0.0873679	-3.85853	0.11762	0.0295576	0.426739	0.0753784	AF-OOA	1
FBti0019010	-1.80742	0.043031	0.255824	0.251339	0.258656	0.0408511	AF-OOA	1
FBti0019133	-0.472091	-0.192313	0.133611	0.0851022	0.587894	na	AF-OOA	1
FBti0019372	0.617527	0.171092	0.0746936	1	-0.915112	na	AF-OOA	1
FBti0019613	-0.29444	0.104121	0.195431	1	1.42743	na	AF-OOA	1
FBti0019617	na	-2.33025	0.0465675	0.0378893	-0.57134	na	AF-OOA	1
FBti0019677	na	na	0.338679	0.146598	na	na	AF-OOA	1
FBti0060715	-1.03366	-3.28034	0.0253896	0.0331283	0.69838	-0.941291	AF-OOA	1
FBti0061417	-0.499134	-0.245821	0.163688	0.0577266	-0.332103	na	AF-OOA	1
FBti0061506	1.63481	-2.3694	0.103629	0.0335251	-0.946044	na	AF-OOA	1
FBti0019430	na	na	0.155122	na	na	na	NA-AF	1
