# Supplementary material for: Stress response, behavior, and development are shaped by transposable element-induced mutations in Drosophila
Source: PLOS journal article supplement (doi:10.1371/journal.pgen.1007900), 2019-02-12
Supplement: S8 (10.1371/journal.pgen.1007900.s008) [file journal.pgen.1007900.s008]

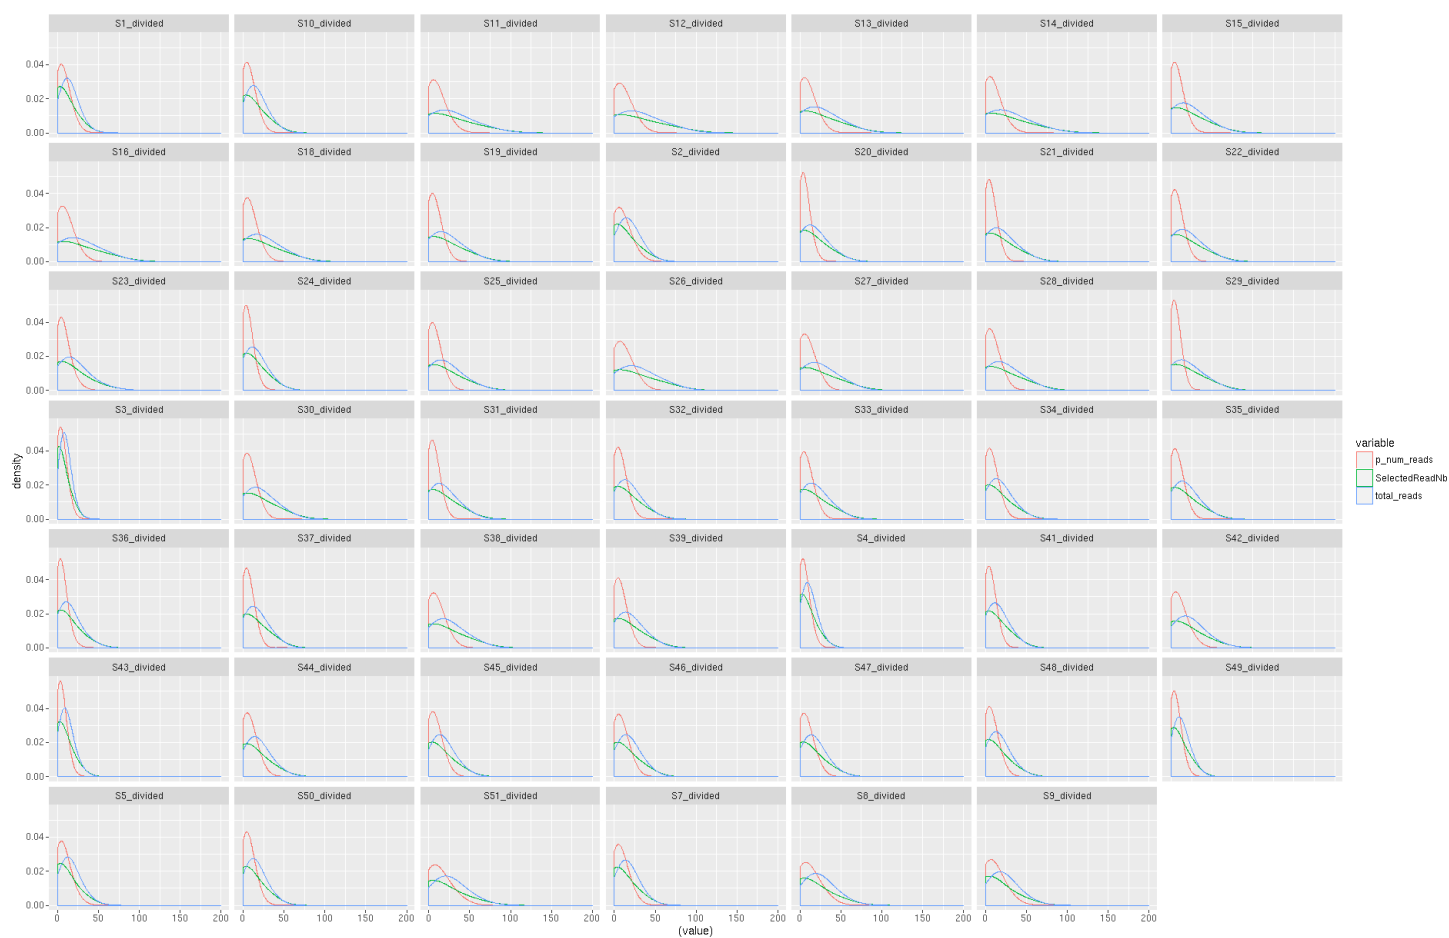

**S8 Fig. Distribution of mapped reads for the presence module (red), absence module (green) and total number of reads (blue) for each one of the 48 DrosEU samples (Kapun *et al.* 2018).**
