# Supplementary material for: Stress response, behavior, and development are shaped by transposable element-induced mutations in Drosophila
Source: PLOS journal article supplement (doi:10.1371/journal.pgen.1007900), 2019-02-12
Supplement: S9 (10.1371/journal.pgen.1007900.s009) [file journal.pgen.1007900.s009]

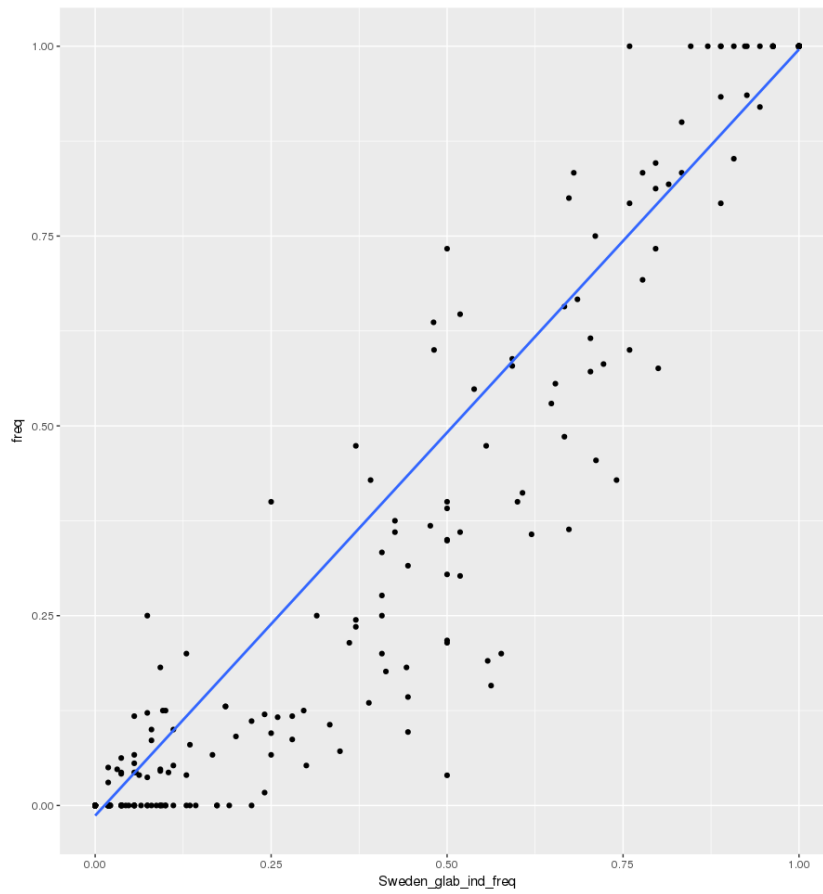

**S9 Fig. Correlation between frequencies estimated with data obtained using different sequencing strategies in the Stockholm (Sweden) population.** Frequencies calculated using individual strain sequencing (x) (Mateo et al 2018) and pool sequencing (y). Pearson correlation coefficient  $r = 0.98$ ,  $p\text{-value} < 2.2e^{-16}$ .
