# Supplementary material for: Stress response, behavior, and development are shaped by transposable element-induced mutations in Drosophila
Source: PLoS Genet. 2019 Feb 12;15(2):e1007900. doi: 10.1371/journal.pgen.1007900 (PMC6372155; doi:10.1371/journal.pgen.1007900)
Supplement: S10 Table — A) Genes the 65 TEs with evidence of selection. B) Genes nearby the 300 HighFreq TEs. C) Genes nearby the 174 OOA TEs. D) Genes nearby the 111 AF-OOA TEs. (XLSX) [file pgen.1007900.s022.xlsx]

## Sheet: Table S10
S10 Table. Enrichment of genes previously described as associated with different stress-related and behaviour-related traits in the different datasets analyzed. A) Genes nearby the 84 TEs with evidence of selection . B) Genes nearby the 300 HighFreq TEs. C) Genes nearby the 174 OOA TEs. D) Genes nearby the 111 AF-OOA TEs
A) Evidence of Selection TEs (84 TEs)
Trait	Number of total genes in the association studies	Number of total genes in 2 or more association studies	Number of unique genes nearby Tes with Evidence of Selection	% in the Evidence of Seletion TEs genes	% in the Non-Evidence of Selection TEs genes	Chi2	pvalue	FDR
Pigmentation	2187	92	8	9.52381	0.492698	111.298	5.09159e-26	8.6557e-25
Olfactory	3258	497	17	20.2381	2.81541	84.0023	4.942e-20	4.2007e-19
Alcohol	5651	1343	21	25	7.75412	32.0673	1.48923e-08	8.43897e-08
Heavy-metal	1002	195	6	7.14286	1.10857	21.9529	2.7942e-06	1.18754e-05
Agressiveness	2213	113	3	3.57143	0.645199	6.91451	0.0085499	0.021453
Immunity	3085	998	11	13.0952	5.7892	6.85617	0.00883357	0.021453
Desiccation	490	17	1	1.19048	0.0938471	2.09516	0.147766	0.293361
Xenobiotics	6852	1918	14	16.6667	11.1678	2.01932	0.155309	0.293361
Hypoxia	4495	672	6	7.14286	3.90639	1.54395	0.21403	0.363852
Circadian	4118	320	3	3.57143	1.85935	0.565871	0.451904	0.698398
Cold	1625	53	1	1.19048	0.305003	0.223731	0.636212	0.827469
Heat-shock	1999	193	1	1.19048	1.12617	0.213893	0.643733	0.827469
Locomotion	1987	61	1	1.19048	0.351927	0.136141	0.712148	0.827469
Oxidative	7095	596	4	4.7619	3.47234	0.119002	0.730119	0.827469
Starvation	6768	1784	10	11.9048	10.4053	0.0727888	0.787319	0.836526
Diapause	5482	1312	7	8.33333	7.65441	0.000770866	0.97785	0.97785
Mating	699	5	0	0	0.0293272	9.27087	0.00232827	0.0079161
B) HighFreq TEs (300 TEs)
Trait	Number of total genes in the association studies	Number of total genes in 2 or more association studies	Number of unique genes nearby HighFreq TEs	% in the HighFreq TEs genes	% in the Non-HighFreq TEs genes	Chi2	pvalue	FDR
Olfactory	3258	497	60	16.5289	2.60584	239.616	4.77024e-54	8.10941e-53
Desiccation	490	17	5	1.37741	0.0715564	48.66	3.04417e-12	2.58754e-11
Heavy-metal	1002	195	16	4.40771	1.06738	32.3273	1.30267e-08	7.38179e-08
Alcohol	5651	1343	55	15.1515	7.68038	26.4284	2.73483e-07	1.1623e-06
Cold	1625	53	6	1.65289	0.280262	17.485	2.89583e-05	9.84583e-05
Agressiveness	2213	113	9	2.47934	0.620155	16.0145	6.28577e-05	0.000178097
Xenobiotics	6852	1918	61	16.8044	11.0733	11.1694	0.000831585	0.00201956
Circadian	4118	320	13	3.58127	1.83065	5.02427	0.0249945	0.0531133
Pigmentation	2187	92	5	1.37741	0.518784	3.42865	0.0640744	0.108926
Starvation	6768	1784	49	13.4986	10.3459	3.45558	0.0630386	0.108926
Diapause	5482	1312	35	9.64187	7.61479	1.78795	0.181176	0.279999
Mating	699	5	1	0.275482	0.0238521	1.49802	0.220976	0.31305
Immunity	3085	998	26	7.16253	5.79606	0.973141	0.323898	0.423559
Oxidative	7095	596	9	2.47934	3.5003	0.819916	0.365205	0.443463
Heat-shock	1999	193	4	1.10193	1.12701	0.0426586	0.836369	0.906648
Locomotion	1987	61	2	0.550964	0.351819	0.0341842	0.853316	0.906648
Hypoxia	4495	672	14	3.85675	3.92367	0.00513505	0.942873	0.942873
C) OOA TEs (174 TEs)
Trait	Number of total genes in the association studies	Number of total genes in 2 or more association studies	Number of unique genes nearby OOA TEs	% in the OOA TEs genes	% in the Non-OOA TEs genes	Chi2	pvalue	FDR
Olfactory	3258	497	41	19.0698	2.69535	196.32	1.3275e-44	2.25675e-43
Desiccation	490	17	4	1.86047	0.0768412	51.3303	7.80628e-13	4.86994e-12
Heavy-metal	1002	195	14	6.51163	1.06987	51.1415	8.594e-13	4.86994e-12
Agressiveness	2213	113	7	3.25581	0.626552	18.5669	1.64042e-05	6.97179e-05
Cold	1625	53	4	1.86047	0.289632	12.2752	0.000459026	0.00156069
Alcohol	5651	1343	29	13.4884	7.76688	8.84447	0.00293979	0.0083294
Xenobiotics	6852	1918	38	17.6744	11.1124	8.54722	0.00346051	0.0084041
Starvation	6768	1784	33	15.3488	10.3499	5.16393	0.0230607	0.049004
Circadian	4118	320	8	3.72093	1.84419	3.12006	0.0773339	0.134182
Mating	699	5	0	0	0.0295543	3.08679	0.0789305	0.134182
Immunity	3085	998	16	7.44186	5.80447	0.760575	0.383149	0.56292
Locomotion	1987	61	2	0.930233	0.348741	0.716314	0.397356	0.56292
Diapause	5482	1312	19	8.83721	7.64275	0.276085	0.599278	0.783672
Pigmentation	2187	92	1	0.465116	0.537889	0.105277	0.745587	0.905355
Heat-shock	1999	193	3	1.39535	1.12306	0.00257729	0.959511	0.993764
Hypoxia	4495	672	9	4.18605	3.9189	0.000563629	0.981059	0.993764
Oxidative	7095	596	7	3.25581	3.4815	6.10794e-05	0.993764	0.993764
D) AF-OOA TEs (111 TEs)
Trait	Number of total genes in the association studies	Number of total genes in 2 or more association studies	Number of unique genes nearby AF-OOA TEs	% in the AF-OOA TEs genes	% in the Non-AF-OOA TEs genes	Chi2	pvalue	FDR
Olfactory	3258	497	23	16.0839	2.78988	84.3186	4.21144e-20	7.15944e-19
Pigmentation	2187	92	5	3.4965	0.512066	18.3908	1.79926e-05	0.000152937
Desiccation	490	17	2	1.3986	0.0882872	13.1217	0.000291898	0.00165409
Alcohol	5651	1343	23	16.0839	7.76928	12.4438	0.000419374	0.00178234
Heavy-metal	1002	195	5	3.4965	1.1183	5.17101	0.0229668	0.0687295
Mating	699	5	1	0.699301	0.0235433	5.07613	0.0242575	0.0687295
Circadian	4118	320	6	4.1958	1.84815	3.07951	0.0792844	0.169348
Diapause	5482	1312	17	11.8881	7.62213	3.07115	0.0796931	0.169348
Cold	1625	53	2	1.3986	0.300177	2.55788	0.109745	0.204666
Xenobiotics	6852	1918	23	15.5405	11.1569	2.41222	0.120392	0.204666
Oxidative	7095	596	2	1.50376	3.49412	1.02066	0.312363	0.482744
Agressiveness	2213	113	2	1.3986	0.653325	0.33374	0.563465	0.798242
Hypoxia	4495	672	4	2.7972	3.93172	0.230076	0.631467	0.799034
Starvation	6768	1784	17	11.8881	10.4002	0.195928	0.658028	0.799034
Immunity	3085	998	7	4.8951	5.83284	0.0885095	0.766081	0.868225
Heat-shock	1999	193	1	0.699301	1.13008	0.00778237	0.929704	0.98781
Locomotion	1987	61	0	0	0.359035	0.000165851	0.989725	0.989725
