# Supplementary material for: Stress response, behavior, and development are shaped by transposable element-induced mutations in Drosophila
Source: PLoS Genet. 2019 Feb 12;15(2):e1007900. doi: 10.1371/journal.pgen.1007900 (PMC6372155; doi:10.1371/journal.pgen.1007900)
Supplement: S14 Table — HighFreq TEs correspond to the sum of AF, AF-NA, AF-OOA and OOA. p-value (Bonf.) indicates Bonferroni corrected p-values for Chi-square test when comparing HighFreq, AF-OOA and OOA TEs against All TEs. In red p-values < 0.05. (XLSX) [file pgen.1007900.s026.xlsx]

## Sheet: Table S14
S14 Table. Enrichment test for TE families. For each family, table shows the number of TEs in each frequency category. p-value (Bonf.) indicates Bonferroni corrected p-values for Chi-square test when comparing HighFreq, AF-OOA, and OOA TEs against All TEs. In red p-values < 0.05.
	Counts								All		HighFreq		AF-OOA		OOA
TE Family	LRR	Fixed	LowFreq	HighFreq	NA-AF	AF	AF-OOA	OOA	Count	%	%	p-value (Bonf.)	%	p-value (Bonf.)	%	p-value (Bonf.)
jockey	13	6	8	32	2	0	5	25	59	0.0393333	0.106667	4.46855e-41	0.045045	106.874	0.143678	2.72781e-11
F	11	2	2	19	0	0	2	17	34	0.0226667	0.0633333	3.64364e-24	0.018018	112.044	0.0977011	1.16606e-09
BS	9	2	0	21	0	0	7	14	32	0.0213333	0.07	3.9106e-33	0.0630631	0.541598	0.0804598	5.32202e-06
pogo	9	1	6	21	0	0	7	14	37	0.0246667	0.07	1.56642e-27	0.0630631	1.89185	0.0804598	0.000191623
Juan	2	1	0	6	0	0	0	6	9	0.006	0.02	7.52108e-08	0	94.0265	0.0344828	0.000370774
Rt1a	3	1	0	7	0	0	1	6	11	0.00733333	0.0233333	5.55872e-09	0.00900901	80.9761	0.0344828	0.00740927
Doc	10	3	14	17	3	0	1	13	44	0.0293333	0.0566667	1.10847e-12	0.00900901	34.4283	0.0747126	0.0462336
Cr1a	50	4	0	1	0	0	1	0	55	0.0366667	0.00333333	20.0469	0.00900901	20.0469	0	1.31626
copia	3	1	9	7	1	0	0	6	20	0.0133333	0.0233333	0.00178725	0	45.1279	0.0344828	2.86856
HB	33	8	0	0	0	0	0	0	41	0.0273333	0	14.1592	0	14.1592	0	3.99171
297	16	2	2	27	0	3	23	1	47	0.0313333	0.09	8.83045e-37	0.207207	5.41483e-25	0.00574713	7.6153
1360	119	27	0	21	0	0	9	12	167	0.111333	0.07	1.65014	0.0810811	41.8255	0.0689655	8.83001
H	6	15	8	1	0	0	1	0	30	0.02	0.00333333	69.1522	0.00900901	69.1522	0	9.73058
Stalker	1	0	1	2	0	0	0	2	4	0.00266667	0.00666667	2.40582	0	78.6941	0.0114943	11.8967
Tabor	1	1	0	2	0	0	0	2	4	0.00266667	0.00666667	2.40582	0	78.6941	0.0114943	11.8967
diver2	24	2	0	0	0	0	0	0	26	0.0173333	0	31.8469	0	31.8469	0	13.5698
gypsy8	26	0	0	0	0	0	0	0	26	0.0173333	0	31.8469	0	31.8469	0	13.5698
hopper	3	1	1	4	0	0	1	3	9	0.006	0.0133333	0.0333379	0.00900901	94.0265	0.0172414	14.5169
gypsy12	16	7	0	0	0	0	0	0	23	0.0153333	0	37.8102	0	37.8102	0	17.4969
flea	10	1	2	8	0	0	3	5	21	0.014	0.0266667	6.76026e-05	0.027027	48.2609	0.0287356	17.7002
Transpac	1	0	0	4	0	1	1	2	5	0.00333333	0.0133333	9.59984e-06	0.00900901	93.1066	0.0114943	22.3853
opus	6	1	2	11	0	2	9	0	20	0.0133333	0.0366667	9.83893e-13	0.0810811	1.77503e-07	0	22.6843
accord2	1	0	0	0	0	0	0	0	1	0.000666667	0	11.7002	0	11.7002	0	26.0252
BS4	1	0	0	0	0	0	0	0	1	0.000666667	0	11.7002	0	11.7002	0	26.0252
Circe	1	0	0	0	0	0	0	0	1	0.000666667	0	11.7002	0	11.7002	0	26.0252
frogger	1	0	0	0	0	0	0	0	1	0.000666667	0	11.7002	0	11.7002	0	26.0252
G7	0	1	0	0	0	0	0	0	1	0.000666667	0	11.7002	0	11.7002	0	26.0252
gypsy3	1	0	0	0	0	0	0	0	1	0.000666667	0	11.7002	0	11.7002	0	26.0252
invader5	1	0	0	0	0	0	0	0	1	0.000666667	0	11.7002	0	11.7002	0	26.0252
Q	0	1	0	0	0	0	0	0	1	0.000666667	0	11.7002	0	11.7002	0	26.0252
TART-B	0	1	0	0	0	0	0	0	1	0.000666667	0	11.7002	0	11.7002	0	26.0252
accord	0	0	0	1	0	0	1	0	1	0.000666667	0.00333333	11.7002	0.00900901	11.7002	0	26.0252
Tc1	13	4	0	0	0	0	0	0	17	0.0113333	0	54.2391	0	54.2391	0	29.6264
blood	7	1	7	0	0	0	0	0	15	0.01	0	61.6272	0	61.6272	0	35.5912
G5A	7	6	0	1	0	0	1	0	14	0.00933333	0.00333333	71.6538	0.00900901	71.6538	0	39.0906
X	15	5	0	6	1	0	0	5	26	0.0173333	0.02	0.777367	0	31.8469	0.0287356	40.5932
jockey2	6	7	0	0	0	0	0	0	13	0.00866667	0	70.3968	0	70.3968	0	43.0044
invader1	12	0	0	1	0	0	1	0	13	0.00866667	0.00333333	70.3968	0.00900901	70.3968	0	43.0044
17.6	6	0	0	7	0	1	3	3	13	0.00866667	0.0233333	4.28069e-07	0.027027	11.4927	0.0172414	43.864
roo	15	3	59	8	0	0	1	7	85	0.0566667	0.0266667	68.4454	0.00900901	4.63347	0.0402299	46.3856
Stalker2	3	1	1	2	0	0	0	2	7	0.00466667	0.00666667	17.544	0	110.652	0.0114943	46.9708
G4	10	2	0	0	0	0	0	0	12	0.008	0	75.426	0	75.426	0	47.3994
mariner2	11	1	0	0	0	0	0	0	12	0.008	0	75.426	0	75.426	0	47.3994
G5	9	2	0	1	0	0	1	0	12	0.008	0.00333333	75.426	0.00900901	75.426	0	47.3994
Idefix	9	0	0	2	0	0	2	0	11	0.00733333	0.00666667	48.3351	0.018018	48.3351	0	52.3583
Tc3	9	2	0	0	0	0	0	0	11	0.00733333	0	80.9761	0	80.9761	0	52.3583
3S18	6	3	1	0	0	0	0	0	10	0.00666667	0	87.1375	0	87.1375	0	57.9856
Tc1-2	7	3	0	0	0	0	0	0	10	0.00666667	0	87.1375	0	87.1375	0	57.9856
412	5	2	13	1	0	0	0	1	21	0.014	0.00333333	108.914	0	42.5147	0.00574713	58.8329
Bari2	2	0	0	0	0	0	0	0	2	0.00133333	0	38.5742	0	38.5742	0	62.5714
Dm88	1	1	0	0	0	0	0	0	2	0.00133333	0	38.5742	0	38.5742	0	62.5714
Doc2	1	1	0	0	0	0	0	0	2	0.00133333	0	38.5742	0	38.5742	0	62.5714
Doc4	1	1	0	0	0	0	0	0	2	0.00133333	0	38.5742	0	38.5742	0	62.5714
Fw3	2	0	0	0	0	0	0	0	2	0.00133333	0	38.5742	0	38.5742	0	62.5714
gypsy11	1	1	0	0	0	0	0	0	2	0.00133333	0	38.5742	0	38.5742	0	62.5714
gypsy6	2	0	0	0	0	0	0	0	2	0.00133333	0	38.5742	0	38.5742	0	62.5714
gypsy7	2	0	0	0	0	0	0	0	2	0.00133333	0	38.5742	0	38.5742	0	62.5714
HeT-A	0	2	0	0	0	0	0	0	2	0.00133333	0	38.5742	0	38.5742	0	62.5714
invader2	2	0	0	0	0	0	0	0	2	0.00133333	0	38.5742	0	38.5742	0	62.5714
invader6	2	0	0	0	0	0	0	0	2	0.00133333	0	38.5742	0	38.5742	0	62.5714
McClintock	2	0	0	0	0	0	0	0	2	0.00133333	0	38.5742	0	38.5742	0	62.5714
baggins	8	1	0	0	0	0	0	0	9	0.006	0	94.0265	0	94.0265	0	64.4159
R1A1	9	0	0	0	0	0	0	0	9	0.006	0	94.0265	0	94.0265	0	64.4159
S2	4	5	0	0	0	0	0	0	9	0.006	0	94.0265	0	94.0265	0	64.4159
mdg1	7	1	8	3	1	0	1	1	19	0.0126667	0.01	37.8086	0.00900901	105.533	0.00574713	69.1271
mdg3	5	0	3	1	0	0	0	1	9	0.006	0.00333333	94.0265	0	94.0265	0.00574713	71.6426
invader3	7	1	0	0	0	0	0	0	8	0.00533333	0	101.796	0	101.796	0	71.8267
Max	7	0	0	1	0	0	0	1	8	0.00533333	0.00333333	101.796	0	101.796	0.00574713	71.8267
Quasimodo	3	0	0	4	0	0	4	0	7	0.00466667	0.0133333	0.00179767	0.036036	0.00179767	0	80.4604
1731	5	2	0	0	0	0	0	0	7	0.00466667	0	110.652	0	110.652	0	80.4604
Doc3	3	4	0	0	0	0	0	0	7	0.00466667	0	110.652	0	110.652	0	80.4604
gypsy4	6	1	0	0	0	0	0	0	7	0.00466667	0	110.652	0	110.652	0	80.4604
Ivk	6	1	0	0	0	0	0	0	7	0.00466667	0	110.652	0	110.652	0	80.4604
ninja-Dsim-like	6	1	0	0	0	0	0	0	7	0.00466667	0	110.652	0	110.652	0	80.4604
Stalker4	7	0	0	0	0	0	0	0	7	0.00466667	0	110.652	0	110.652	0	80.4604
HMS-Beagle	4	3	2	1	0	0	0	1	10	0.00666667	0.00333333	87.1375	0	87.1375	0.00574713	83.1914
Rt1b	9	8	1	8	0	0	4	4	26	0.0173333	0.0266667	0.00283294	0.036036	26.3988	0.0229885	86.4365
Tirant	6	1	8	1	0	0	0	1	16	0.0106667	0.00333333	86.058	0	57.7812	0.00574713	88.1309
rover	1	0	0	2	0	0	2	0	3	0.002	0.00666667	0.540097	0.018018	0.540097	0	88.5735
G3	3	0	0	0	0	0	0	0	3	0.002	0	60.9494	0	60.9494	0	88.5735
gypsy10	3	0	0	0	0	0	0	0	3	0.002	0	60.9494	0	60.9494	0	88.5735
Helena	2	1	0	0	0	0	0	0	3	0.002	0	60.9494	0	60.9494	0	88.5735
micropia	2	1	0	0	0	0	0	0	3	0.002	0	60.9494	0	60.9494	0	88.5735
Porto1	3	0	0	0	0	0	0	0	3	0.002	0	60.9494	0	60.9494	0	88.5735
transib4	2	1	0	0	0	0	0	0	3	0.002	0	60.9494	0	60.9494	0	88.5735
ZAM	3	0	0	0	0	0	0	0	3	0.002	0	60.9494	0	60.9494	0	88.5735
Tom1	2	0	0	1	0	0	1	0	3	0.002	0.00333333	60.9494	0.00900901	60.9494	0	88.5735
BS3	5	1	0	0	0	0	0	0	6	0.004	0	105.12	0	105.12	0	90.6594
G6	6	0	0	0	0	0	0	0	6	0.004	0	105.12	0	105.12	0	90.6594
gtwin	4	1	1	0	0	0	0	0	6	0.004	0	105.12	0	105.12	0	90.6594
hopper2	5	1	0	0	0	0	0	0	6	0.004	0	105.12	0	105.12	0	90.6594
rooA	5	1	0	0	0	0	0	0	6	0.004	0	105.12	0	105.12	0	90.6594
Rt1c	5	1	0	0	0	0	0	0	6	0.004	0	105.12	0	105.12	0	90.6594
springer	2	0	3	1	0	0	1	0	6	0.004	0.00333333	105.12	0.00900901	105.12	0	90.6594
Bari1	1	0	2	2	0	0	2	0	5	0.00333333	0.00666667	6.00546	0.018018	6.00546	0	102.931
G	5	0	0	0	0	0	0	0	5	0.00333333	0	93.1066	0	93.1066	0	102.931
gypsy	3	2	0	0	0	0	0	0	5	0.00333333	0	93.1066	0	93.1066	0	102.931
gypsy9	4	1	0	0	0	0	0	0	5	0.00333333	0	93.1066	0	93.1066	0	102.931
HMS-Beagle2	4	1	0	0	0	0	0	0	5	0.00333333	0	93.1066	0	93.1066	0	102.931
transib3	5	0	0	0	0	0	0	0	5	0.00333333	0	93.1066	0	93.1066	0	102.931
diver	1	0	3	1	0	0	0	1	5	0.00333333	0.00333333	93.1066	0	93.1066	0.00574713	102.931
invader4	3	1	0	1	0	0	0	1	5	0.00333333	0.00333333	93.1066	0	93.1066	0.00574713	102.931
transib2	5	4	0	5	0	0	3	2	14	0.00933333	0.0166667	0.0429928	0.027027	15.0478	0.0114943	103.642
Burdock	7	0	3	4	0	0	2	2	14	0.00933333	0.0133333	1.29811	0.018018	71.6538	0.0114943	103.642
gypsy5	2	0	0	2	0	0	1	1	4	0.00266667	0.00666667	2.40582	0.00900901	78.6941	0.00574713	107.928
Fw2	4	0	0	0	0	0	0	0	4	0.00266667	0	78.6941	0	78.6941	0	107.928
GATE	3	1	0	0	0	0	0	0	4	0.00266667	0	78.6941	0	78.6941	0	107.928
gypsy2	2	2	0	0	0	0	0	0	4	0.00266667	0	78.6941	0	78.6941	0	107.928
TART-A	0	4	0	0	0	0	0	0	4	0.00266667	0	78.6941	0	78.6941	0	107.928
FB	23	10	1	4	0	0	0	4	38	0.0253333	0.0133333	75.2399	0	16.5778	0.0229885	108.745
I	7	4	5	5	0	0	3	2	21	0.014	0.0166667	1.51308	0.027027	48.2609	0.0114943	109.041
S	22	7	0	10	0	0	5	5	39	0.026	0.0333333	0.00467866	0.045045	35.8346	0.0287356	111.904
G2	6	4	1	2	0	0	1	1	13	0.00866667	0.00666667	64.0687	0.00900901	70.3968	0.00574713	112.373
